# Supplementary material for: Anti-Migraine Effect of the Herbal Combination of Chuanxiong Rhizoma and Cyperi Rhizoma and UPLC-MS/MS Method for the Simultaneous Quantification of the Active Constituents in Rat Serum and Cerebral Cortex
Source: PubMed Central journal article supplement (PMC6630925; doi:10.3390/molecules24122230), 2019-06-14
Supplement: molecules-24-02230-s001.pdf [file molecules-24-02230-s001.pdf]

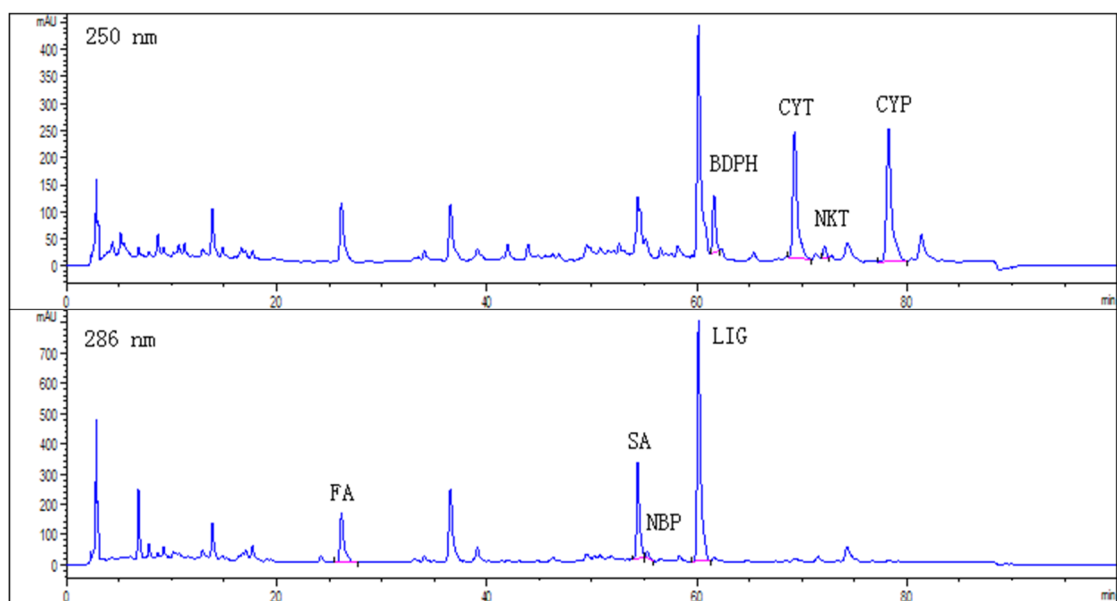

Figure S1. The HPLC chromatograms of CRCR extract solution.
